# Supplementary material
Source: publisher figshare collection journal article supplement (https://asha.figshare.com/articles/dataset/_/16649602)
Supplement: Supplementary file 1 [file 1]

**Supplemental Material S3.** The numbers and types of chemotherapy treatment modifications by study arm and participant. Toxicities resulting in a deviation from prescribed chemotherapy regimen were reported in the patient's medical records. In some instances, there were multiple toxicities leading to a change in chemotherapy. A change in treatment was categorized in four ways: (1) dose = change in cisplatin dose from the prescribed cisplatin dose, (2) drug = change in drug from cisplatin to carboplatin, (3) withheld = withholding or postponing a dose of cisplatin, or (4) stop = cessation of the drug treatment before all prescribed doses were administered. A total of 26 patients had modifications to their prescribed chemotherapy regimen, 16 in the A-OM arm and 10 in the UC arm. In addition, 7 patients had multiple instances where the treatment deviated from prescribed regimen. Also see Figure 7 in the main text.

| Participant No. | Tumor Location | Indicator of treatment change         | Type of treatment deviation  |
|-----------------|----------------|---------------------------------------|------------------------------|
| <b>A-OM Arm</b> |                |                                       |                              |
| 105             | Head/Neck      | Ototoxicity                           | Dose                         |
| 138             | Head/Neck      | Other*                                | Dose                         |
| 141             | Head/Neck      | Low WBC                               | Stop                         |
| 109             | Lung           | Nephrotoxicity                        | Drug                         |
| 119             | Lung           | Gastrointestinal                      | Dose                         |
| 130             | Lung           | Low WBC<br>Low WBC<br>Patient request | Withheld<br>Withheld<br>Stop |
| 100             | Oropharyngeal  | Gastrointestinal                      | Dose                         |
| 117             | Oropharyngeal  | Nephrotoxicity<br>Gastrointestinal    | Dose<br>Stop                 |
| 122             | Oropharyngeal  | Low WBC                               | Stop                         |
| 126             | Oropharyngeal  | Nephrotoxicity<br>Patient Request     | Dose<br>Withheld             |
| 128             | Oropharyngeal  | Other*                                | Stop                         |
| 133             | Oropharyngeal  | Nephrotoxicity                        | Dose                         |
| 136             | Oropharyngeal  | Nephrotoxicity                        | Drug                         |
| 139             | Oropharyngeal  | Other*                                | Withheld                     |
| 147             | Oropharyngeal  | Low WBC                               | Stop                         |
| 149             | Oropharyngeal  | Nephrotoxicity                        | Dose                         |
| <b>UC Arm</b>   |                |                                       |                              |
| 127             | Bladder        | Other*                                | Stop                         |
| 111             | Head/Neck      | Other*                                | Stop                         |
| 104             | Lung           | Low WBC                               | Withheld                     |
| 107             | Lung           | Patient Request                       | Stop                         |
| 132             | Lung           | Ototoxicity                           | Dose                         |

|     |               |                                            |                              |
|-----|---------------|--------------------------------------------|------------------------------|
| 108 | Oropharyngeal | Low WBC<br>Low Platelet, Low WBC           | Withheld<br>Stop             |
| 118 | Oropharyngeal | Other*                                     | Stop                         |
| 134 | Oropharyngeal | Nephrotoxicity<br>Gastrointestinal, Other* | Withheld<br>Stop             |
| 137 | Oropharyngeal | Low WBC<br>Nephrotoxicity<br>Low WBC       | Withheld<br>Dose<br>Stop     |
| 142 | Oropharyngeal | Low RBC, Low WBC<br>Other*<br>Low WBC      | Withheld<br>Withheld<br>Stop |

*Note.* WBC = white blood cell count; RBC = red blood cell count. \*Other: Participant number 111 = stopped treatment for nutritional concerns; 118 = stopped treatment due to admission to ICU for hypoxic respiratory failure and aspiration pneumonia; 127 = stopped treatment because the disease was re-staged and tumor was resected; 128 = stopped treatment due to multiple mild cytopenias; 134 = stopped treatment admitted to hospital for neutropenic fever, nausea and constipation; 138 = reduced dose due to nutritional concerns and patient fatigue; 139 = withheld a dose as unmanaged diabetes caused nutritional concerns; 142 = withheld a dose due to dehydration, cognition changes and fever.
