# Supplementary material
Source: publisher figshare collection journal article supplement (https://asha.figshare.com/articles/dataset/_/16649602)
Supplement: Supplementary file 2 [file 1]

**Supplemental Material S1.** Patient demographics, clinical aspects of diagnosed cancer and hearing characteristics by treatment arm and primary tumor location. HN = head and neck cancer; ORO = oropharyngeal cancer; TE = testicular cancer; BL = bladder cancer; ASHA = American Speech-Language-Hearing Association; SRO = sensitive range for ototoxicity; SPL = sound pressure level; PE = program evaluation, dB = decibel.

<sup>1</sup>Oropharyngeal cancer includes tonsil, base of tongue, uvula, and soft palate

\*Clinical staging was compiled from medical records and, if necessary, interpreted from prognostic/staging done by the oncologist which utilized the TNM system created by the American Joint Committee on Cancer and the International Union Against Cancer. For this system, T = tumor size; N = spread to nearby lymph nodes; M = metastasis or spread to other parts of the body.

\*Medical record indicated high grade urothelial carcinoma, unable to locate TMN staging or clinical staging

\*\*\*\*In the cohort diagram we indicate that 4 people did not follow up; here we show that one additional participant did not have hearing thresholds tested within the SRO at baseline, which precluded analysis of their SRO hearing shift data

| Arm                                   | A-OM (N = 24)   |                  |               |        | UC (N = 22)     |                  |                 |    |                 | ALL             |
|---------------------------------------|-----------------|------------------|---------------|--------|-----------------|------------------|-----------------|----|-----------------|-----------------|
| Primary tumor location                | HN              | Oro <sup>1</sup> | Lung          | Kidney | HN              | Oro <sup>1</sup> | Lung            | TE | BL              | -               |
| N                                     | 4               | 13               | 6             | 1      | 5               | 7                | 7               | 1  | 2               | 46              |
| Age, mean (range), y                  | 63.8<br>(57-69) | 63.1<br>(51-70)  | 66<br>(58-78) | 78     | 62.8<br>(54-67) | 70.1<br>(63-77)  | 64.5<br>(58-69) | 30 | 69.5<br>(67-72) | 64.7<br>(30-78) |
| Clinical Stage <sup>+</sup> , No. (%) |                 |                  |               |        |                 |                  |                 |    |                 |                 |
| I                                     | -               | 1                | -             | -      | -               | -                | -               | -  | -               | 1               |
| IA                                    | -               | -                | 1             | -      | -               | -                | 1               | -  | -               | 2               |
| IB                                    | -               | -                | -             | -      | -               | -                | 1               | -  | -               | 1               |
| II                                    | -               | -                | -             | -      | -               | -                | 1               | -  | 1               | 2               |
| IIA                                   | -               | -                | 1             | -      | -               | -                | -               | -  | -               | 1               |
| IIB                                   | -               | -                | 1             | -      | -               | -                | 1               | -  | -               | 2               |
| III                                   | 1               | 1                | -             | -      | 1               | -                | -               | -  | -               | 3               |
| IIIA                                  | -               | -                | 2             | -      | -               | -                | 3               | -  | -               | 5               |
| IIIB                                  | -               | -                | 1             | -      | -               | -                | -               | 1  | -               | 2               |
| IV                                    | -               | -                | -             | -      | -               | -                | -               | -  | 1               | 1               |
| IVA                                   | 3               | 11               | -             | -      | 4               | 7                | -               | -  | -               | 25              |
| Unknown                               | -               | -                | -             | 1*     | -               | -                | -               | -  | -               | 1*              |
| Chemotherapy regimen                  |                 |                  |               |        |                 |                  |                 |    |                 |                 |
| Cisplatin cycles, No. (%)             |                 |                  |               |        |                 |                  |                 |    |                 |                 |
| 1                                     | -               | 1                | 1             | -      | -               | -                | -               | -  | -               | 2               |
| 2                                     | -               | -                | -             | -      | -               | -                | -               | -  | 1               | 1               |
| 3                                     | -               | 1                | 1             | -      | -               | -                | 1               | -  | -               | 3               |
| 4                                     | -               | 1                | 4             | 1      | -               | 2                | 4               | -  | 1               | 13              |
| 5                                     | -               | 3                | -             | -      | 1               | 2                | -               | -  | -               | 6               |

|                                                                               |                  |                  |                  |            |                |              |                |                  |                  |                  |
|-------------------------------------------------------------------------------|------------------|------------------|------------------|------------|----------------|--------------|----------------|------------------|------------------|------------------|
| 6                                                                             | 2                | 4                | -                | -          | 2              | 2            | 1              | -                | -                | 11               |
| 7                                                                             | 1                | 3                | -                | -          | 1              | 1            |                | -                | -                | 6                |
| 8                                                                             | 1                | -                | -                | -          | 1              | -            | -              | -                | -                | 3                |
| 20                                                                            | -                | -                | -                | -          | -              | -            | 1              | 1                | -                | 1                |
| Cisplatin initial dose, mean (range), mg/m <sup>2</sup>                       | 40 (40-40)       | 41.9 (30-75)     | 68.3 (60-80)     | 70         | 40 (40-40)     | 38.6 (30-40) | 63.6 (50-75)   | 20               | 70 (70-70)       | 49.1 (20-80)     |
| Cisplatin cumulative dose, at last audiogram, mean (range), mg/m <sup>2</sup> | 203 (0-320)      | 195 (40-240)     | 218 (80-300)     | 280        | 208 (0-320)    | 179 (0-240)  | 259 (0-450)    | 400              | 210 (140-280)    | 214 (0-450)      |
| Combination agent, No. (%)                                                    |                  |                  |                  |            |                |              |                |                  |                  |                  |
| Cetuximab                                                                     | -                | 1 (4.2)          | -                | -          | -              | -            |                | -                | -                | 1 (2.2)          |
| Docetaxel                                                                     | -                | 1 (4.2)          | -                | -          | -              | -            |                | -                | -                | 1 (2.2)          |
| Etoposide                                                                     | -                | -                | 3 (12.5)         | -          | -              | -            | 4 (18.2)       | 1 (4.5)          | -                | 8 (17.4)         |
| Filgrastrim                                                                   | -                | -                | -                | -          | -              | -            |                | -                | 1 (4.5)          | 1 (2.2)          |
| Flourouracil (5FU)                                                            | -                | 1 (4.2)          | -                | -          | -              | -            |                | -                | -                | 1 (2.2)          |
| Gemcitabine                                                                   | -                | -                | -                | 1 (4.2)    | -              | -            |                | -                | 2 (9.1)          | 3 (6.5)          |
| Pemetrexed                                                                    | -                | -                | 3 (12.5)         | -          | -              | -            | 3 (13.6)       | -                | -                | 6 (13)           |
| Concurrent Radiation                                                          | 4 (100)          | 13 (100)         | 0                | 0          | 5 (100)        | 7 (100)      | 4 (57.1)       | 0                | 0                | 33 (71.7)        |
| Radiation dose, mean (range), Gy                                              | 68.3 (63-70)     | 69.5 (63-70)     | -                | -          | 69.3 (67-70)   | 69.4 (66-70) | 57.3 (45-70)   | -                | -                | 67.8 (45-70)     |
| Radiation right cochlear dose, mean (range), Gy                               | 3.7 (2-7)        | 13.9 (2-56)      | -                | -          | 17.1 (5-54)    | 12.2 (3-27)  | 0              | -                | -                | 8.0 (0-56)       |
| Radiation left cochlear dose, mean (range), Gy                                | 2.9 (2-4)        | 17.8 (3-43)      | -                | -          | 27.0 (2-72)    | 12.5 (3-36)  | 0              | -                | -                | 10.1 (0-72)      |
| Hearing characteristics                                                       |                  |                  |                  |            |                |              |                |                  |                  |                  |
| Pure tone average (0.5, 1, 2, 3, 4 kHz) at PE1, mean (range), dB SPL          | 44.8 (31.5-62.5) | 36.8 (18.5-60.5) | 40.5 (24.5-64.5) | 47 (47-47) | 39.7 (19-62.5) | 47.6 (31-59) | 42.6 (26-56.5) | 18.5 (18.5-18.5) | 59.5 (45.5-73.5) | 41.6 (18.5-73.5) |

|                                                                          |                     |                      |                     |                     |                     |                     |                     |                     |                     |                      |
|--------------------------------------------------------------------------|---------------------|----------------------|---------------------|---------------------|---------------------|---------------------|---------------------|---------------------|---------------------|----------------------|
| Pure tone average (0.5, 1, 2, 3, 4 kHz) at last PE, mean (range), dB SPL | 43.3<br>(29-63)     | 42<br>(23.5-67.5)    | 43.7<br>(24.5-63.5) | 49.5<br>(49.5-49.5) | 35.4<br>(22-51)     | 49.9<br>(35-61)     | 42.1<br>(27.5-52.0) | 20<br>(20-20)       | 67.8<br>(48.5-87.0) | 43.7<br>(20-87)      |
| SRO at baseline PE1, mean (range), dB SPL                                | 74.7<br>(69.6-80)   | 72.8<br>(48.2-87.1)  | 72.6<br>(61.1-83.2) | 77.5<br>(77.5-77.5) | 72.9<br>(53.9-84.3) | 80.9<br>(66.8-91.8) | 75.1<br>(66.1-83.2) | 48.2<br>(48.2-48.2) | 80.9<br>(76.8-85.0) | 74.5<br>(48.2-91.8)  |
| SRO at last PE, mean (range), dB SPL                                     | 80.5<br>(72.9-88.2) | 81.7<br>(60.4-103.2) | 76.7<br>(58.2-92.1) | 81.1<br>(81.1-81.1) | 82.6<br>(76.1-90.7) | 88.9<br>(83.9-91.8) | 78.8<br>(68.2-86.8) | 56.8<br>(56.8-56.8) | 91.3<br>(83.9-98.6) | 81.4<br>(56.8-103.2) |
| ASHA significant shift, No. (%)                                          | 2 (67)              | 11 (85)              | 4 (67)              | 0                   | 3 (100)             | 3 (50)              | 2 (33)              | 1 (100)             | 2 (100)             | 28 (68)              |
| ****No audiologic follow up or incomplete baseline, No.                  | 1                   | 0                    | 0                   | 0                   | 2                   | 1                   | 1                   | 0                   | 0                   | 5                    |
