# Supplementary material
Source: publisher figshare collection journal article supplement (https://asha.figshare.com/articles/dataset/_/16649602)

**Supplemental Material S2.** Audiograms comparing those with and without an ototoxic hearing shift. Data from Fig. 5 are replotted in this figure to show thresholds in dB HL. This was done to assist readers accustomed to clinical audiograms. To determine shifts for the purposes of analyses, data were analyzed as measured in dB SPL (and shown in Fig. 5) with each participant's PE1 audiogram (solid lines) compared to their final audiometric assessment (dashed lines). Thin lines depict data from individual ears; thick lines depict means. The final assessment could be PE2 or PE3, depending on the participant date of study enrollment and date of death. Data are shown for both groups separately in the left (A-OM) and middle (UC) columns. "No responses" were set to 110 dB SPL for inclusion in the means shown. Missing data were not imputed for the statistical analysis. Rows indicate those who did not exhibit an ASHA shift in hearing [top] in the SRO frequencies versus those who exhibited an ASHA shift [bottom].

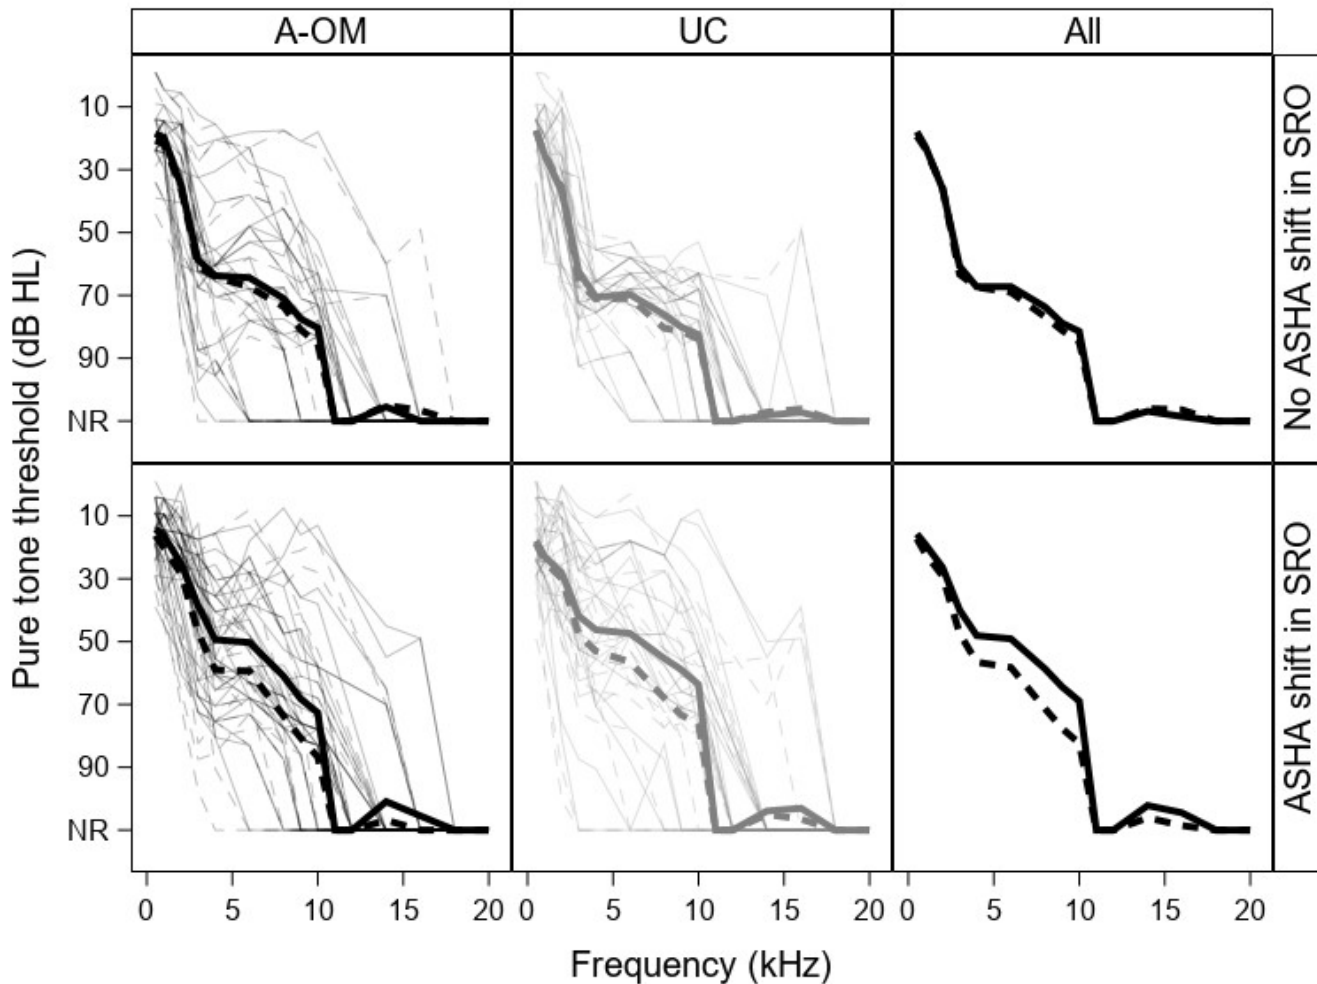

Supplement: Supplementary file 3 [file 1]
